# Supplementary material
Source: PubMed Central journal article supplement (PMC4235594)
Supplement: Supp_Figure2.pdf [file Supp_Figure2.pdf]

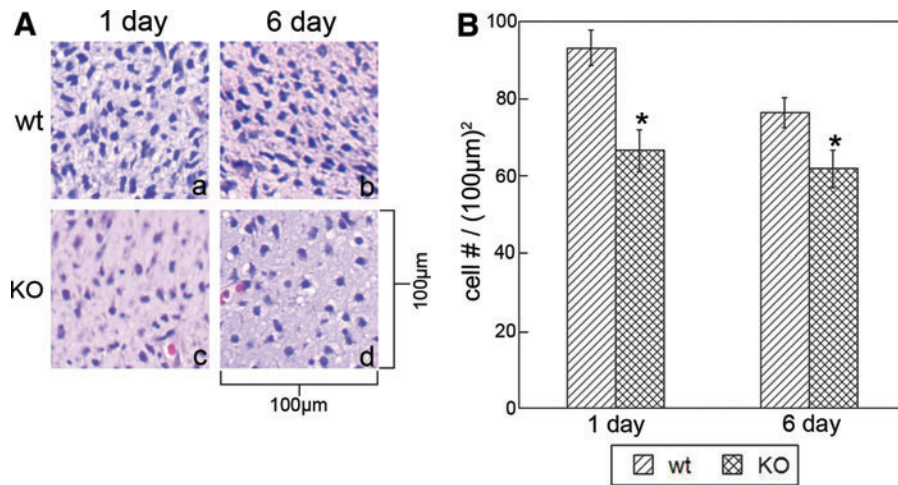

**SUPPLEMENTARY FIG. S2.** First-molar dental pulp cell density in 1- and 6-day wt and DSPP-KO mice. All samples were stained with H&E. **(A)** Photos of pulp cells from four groups. Each photo is representative of dental pulp cells located in an  $(100 \mu\text{m})^2$  area from each of the following four groups: **Group a:** wt 1-day dental pulp cells. **Group b:** wt 6-day dental pulp cells. **Group c:** DSPP-KO 1-day dental pulp cells. **Group d:** DSPP-KO 6-day dental pulp cells. **(B)** Bar graphs of dental pulp cell density (see “Materials and Methods” section) from postnatal 1- and 6-day wt and DSPP-KO mice. Each bar represents the mean and standard deviation of the dental pulp cells in an  $(100 \mu\text{m})^2$  area from each group. Dental pulp cell density was significantly reduced in DSPP-KO mice compared with those in wt mice at postnatal 1 and 6 days. \* $P < 0.05$ ,  $n = 12$ . H&E, hematoxylin and eosin.
